# Supplementary material for: SMOKE for Europe – adaptation, modification and evaluation of a comprehensive emission model for Europe
Source: Copernicus journal article supplement (doi:10.5194/gmd-4-47-2011), 2011-01-25
Supplement: Supplementary file [file gmd-4-47-2011-supplement.pdf]

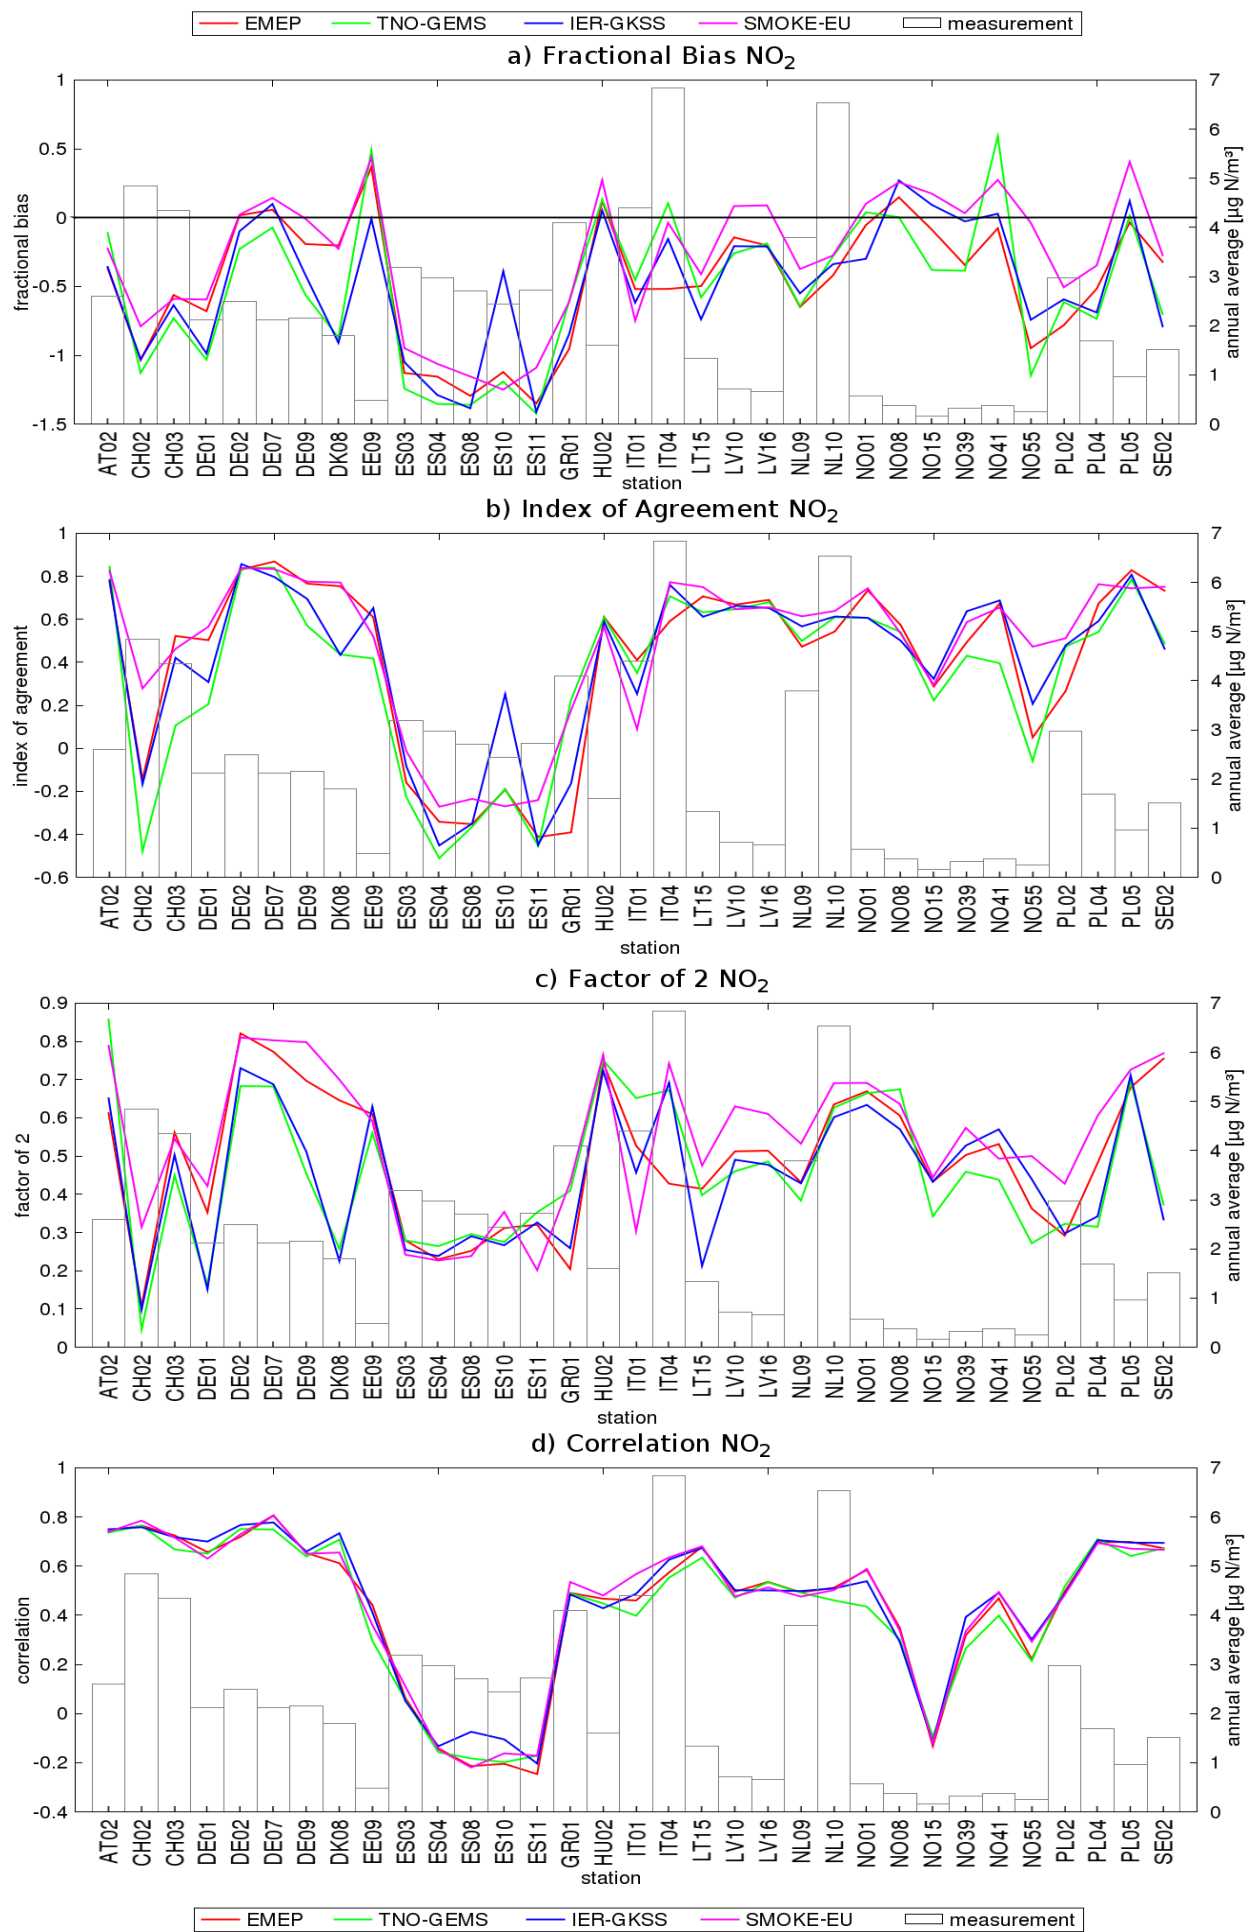

Figure S1: Comparison of mean daily air concentrations of NO<sub>2</sub>, calculated by CMAQ using four different emission datasets, with observations from rural EMEP stations for 2000. a) fractional bias, b) index of agreement, c) relative amount of values within a factor of 2 (1=100%), d) correlation. Black boxes indicate measured annual average concentrations.

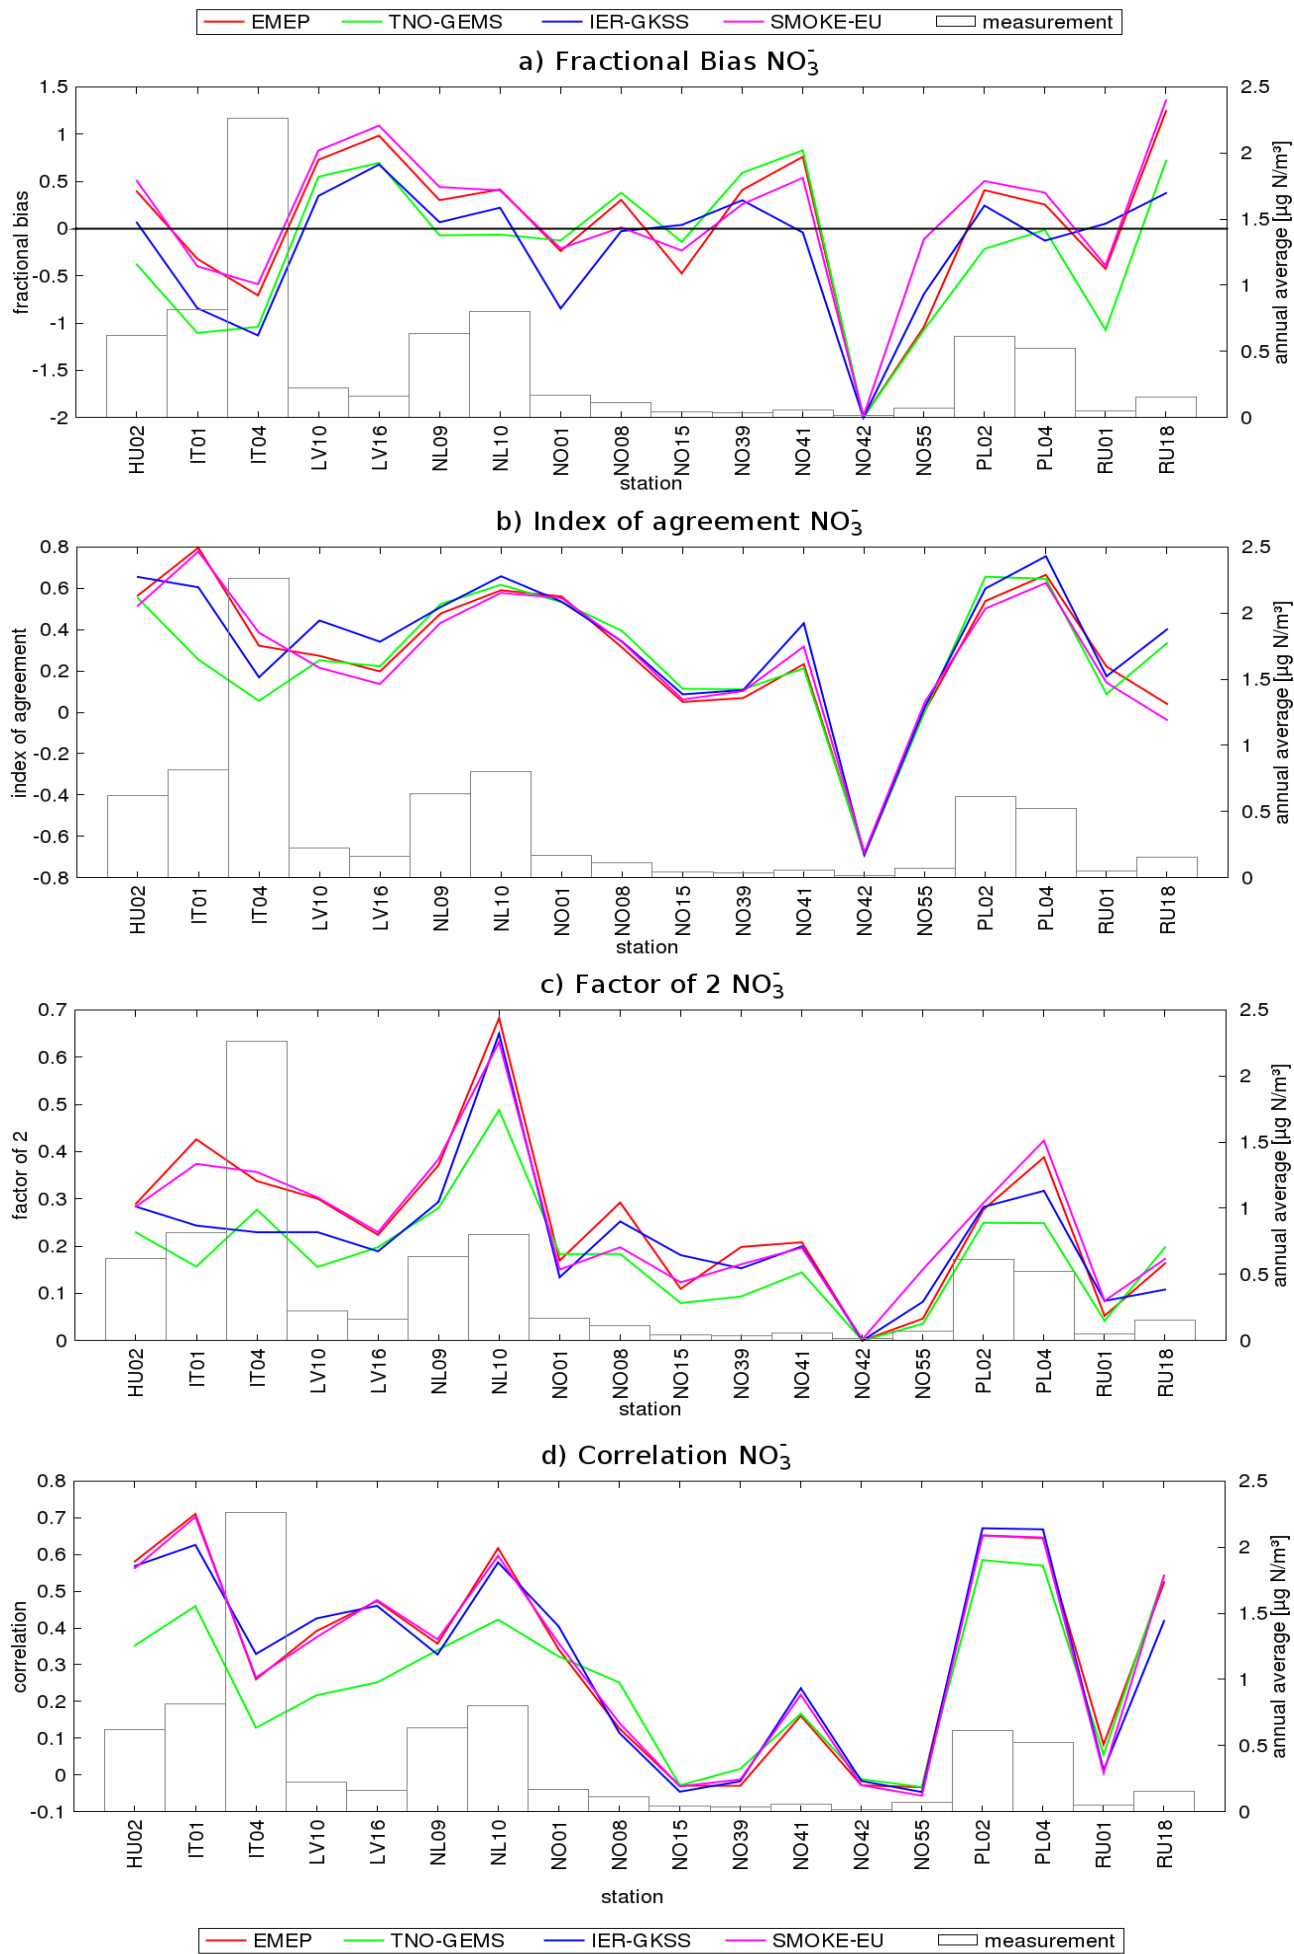

Figure S2: Comparison of mean daily air concentrations of  $\text{NO}_3$ , calculated by CMAQ using four different emission datasets, with observations from rural EMEP stations for 2000. a)

fractional bias, b) index of agreement, c) relative amount of values within a factor of 2 (1=100%),

d) correlation. Black boxes indicate measured annual average concentrations.

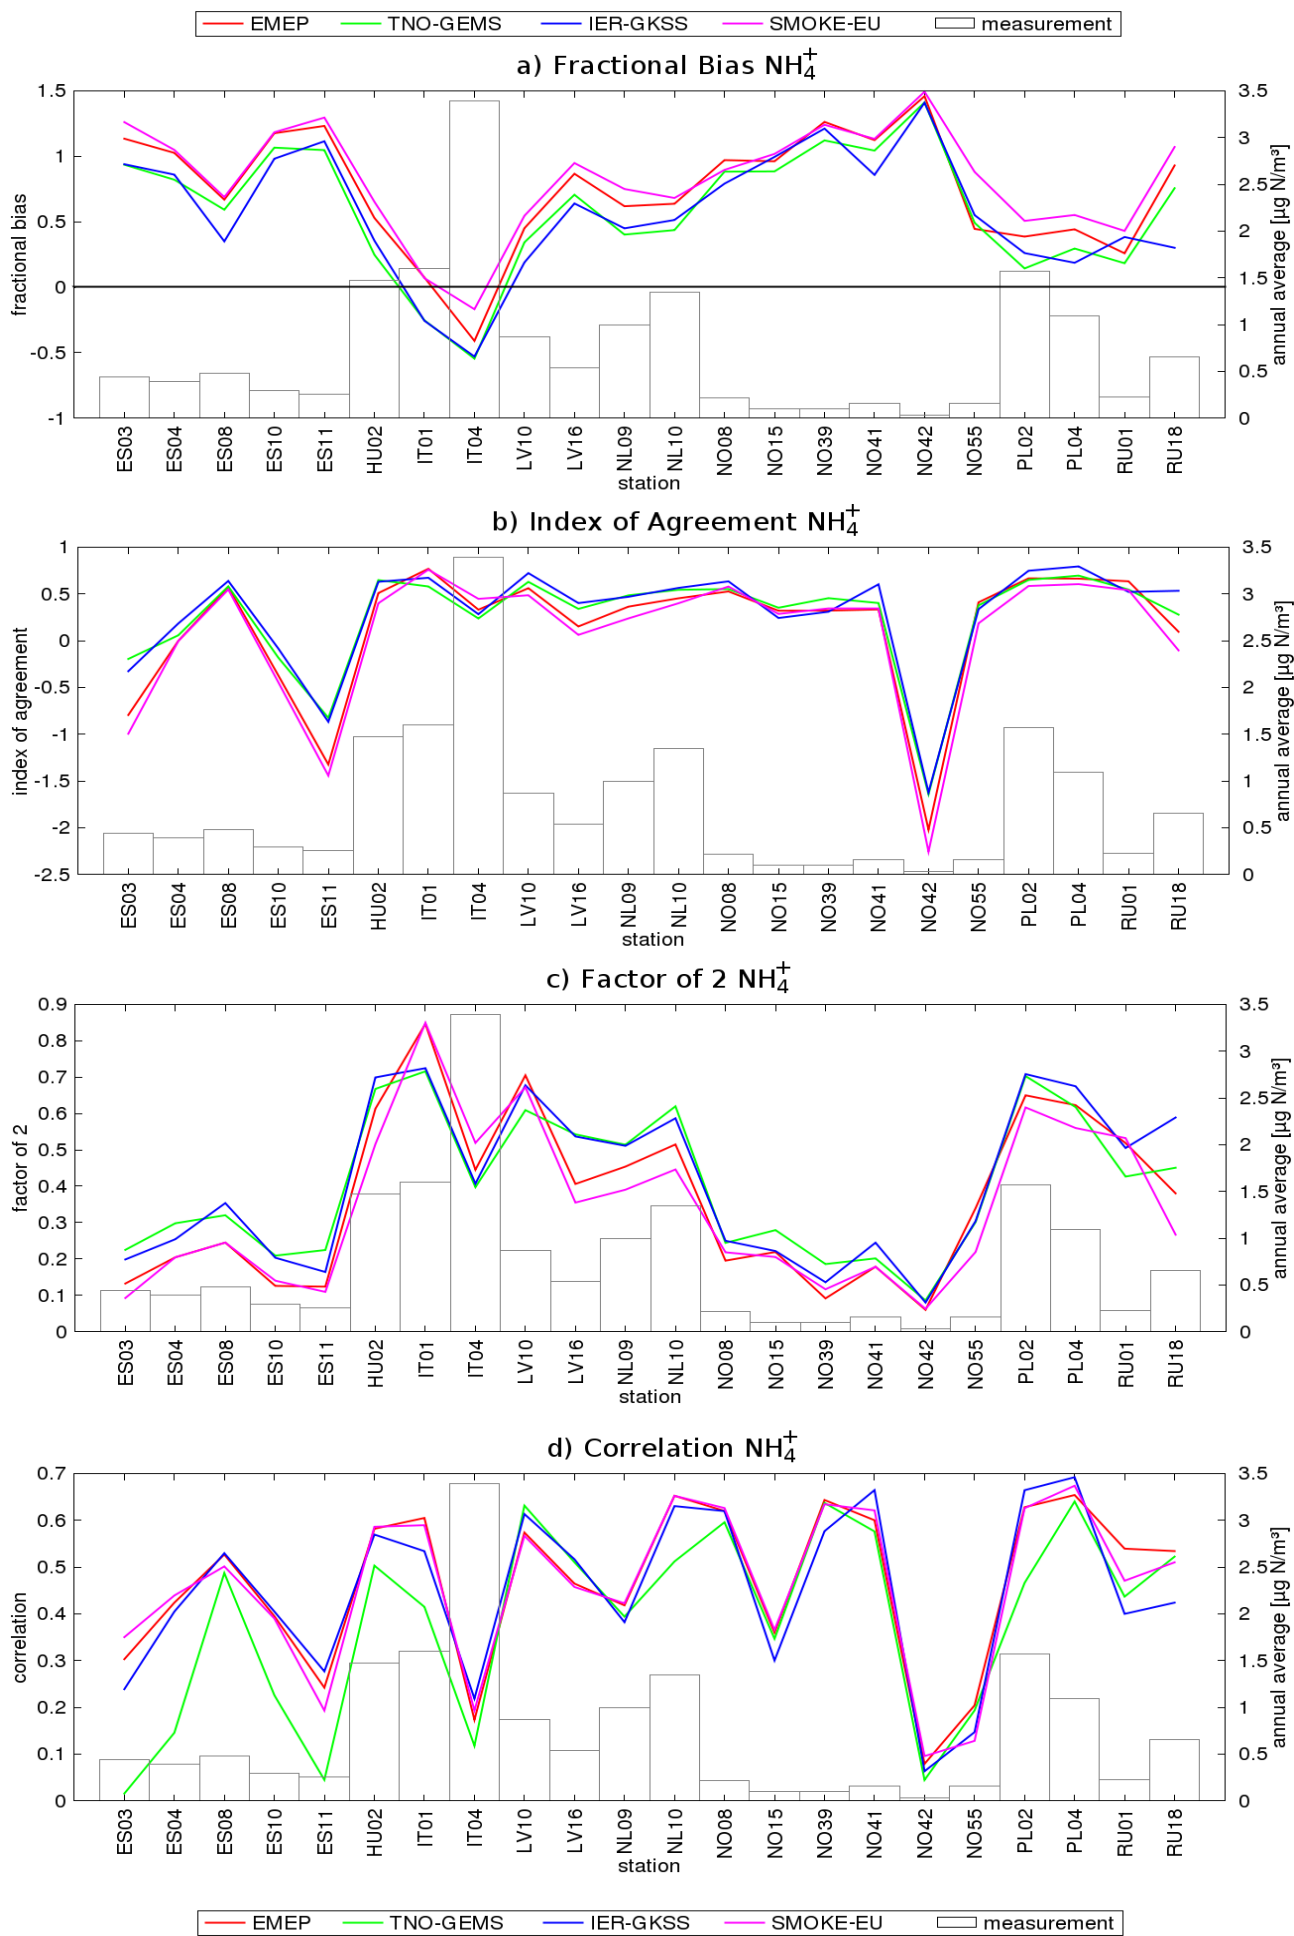

Figure S3: Comparison of mean daily air concentrations of  $\text{NH}_4^+$ , calculated by CMAQ using four different emission datasets, with observations from rural EMEP stations for 2000. a) fractional bias, b) index of agreement, c) relative amount of values within a factor of 2 ( $1=100\%$ ), d) correlation. Black boxes indicate measured annual average concentrations.

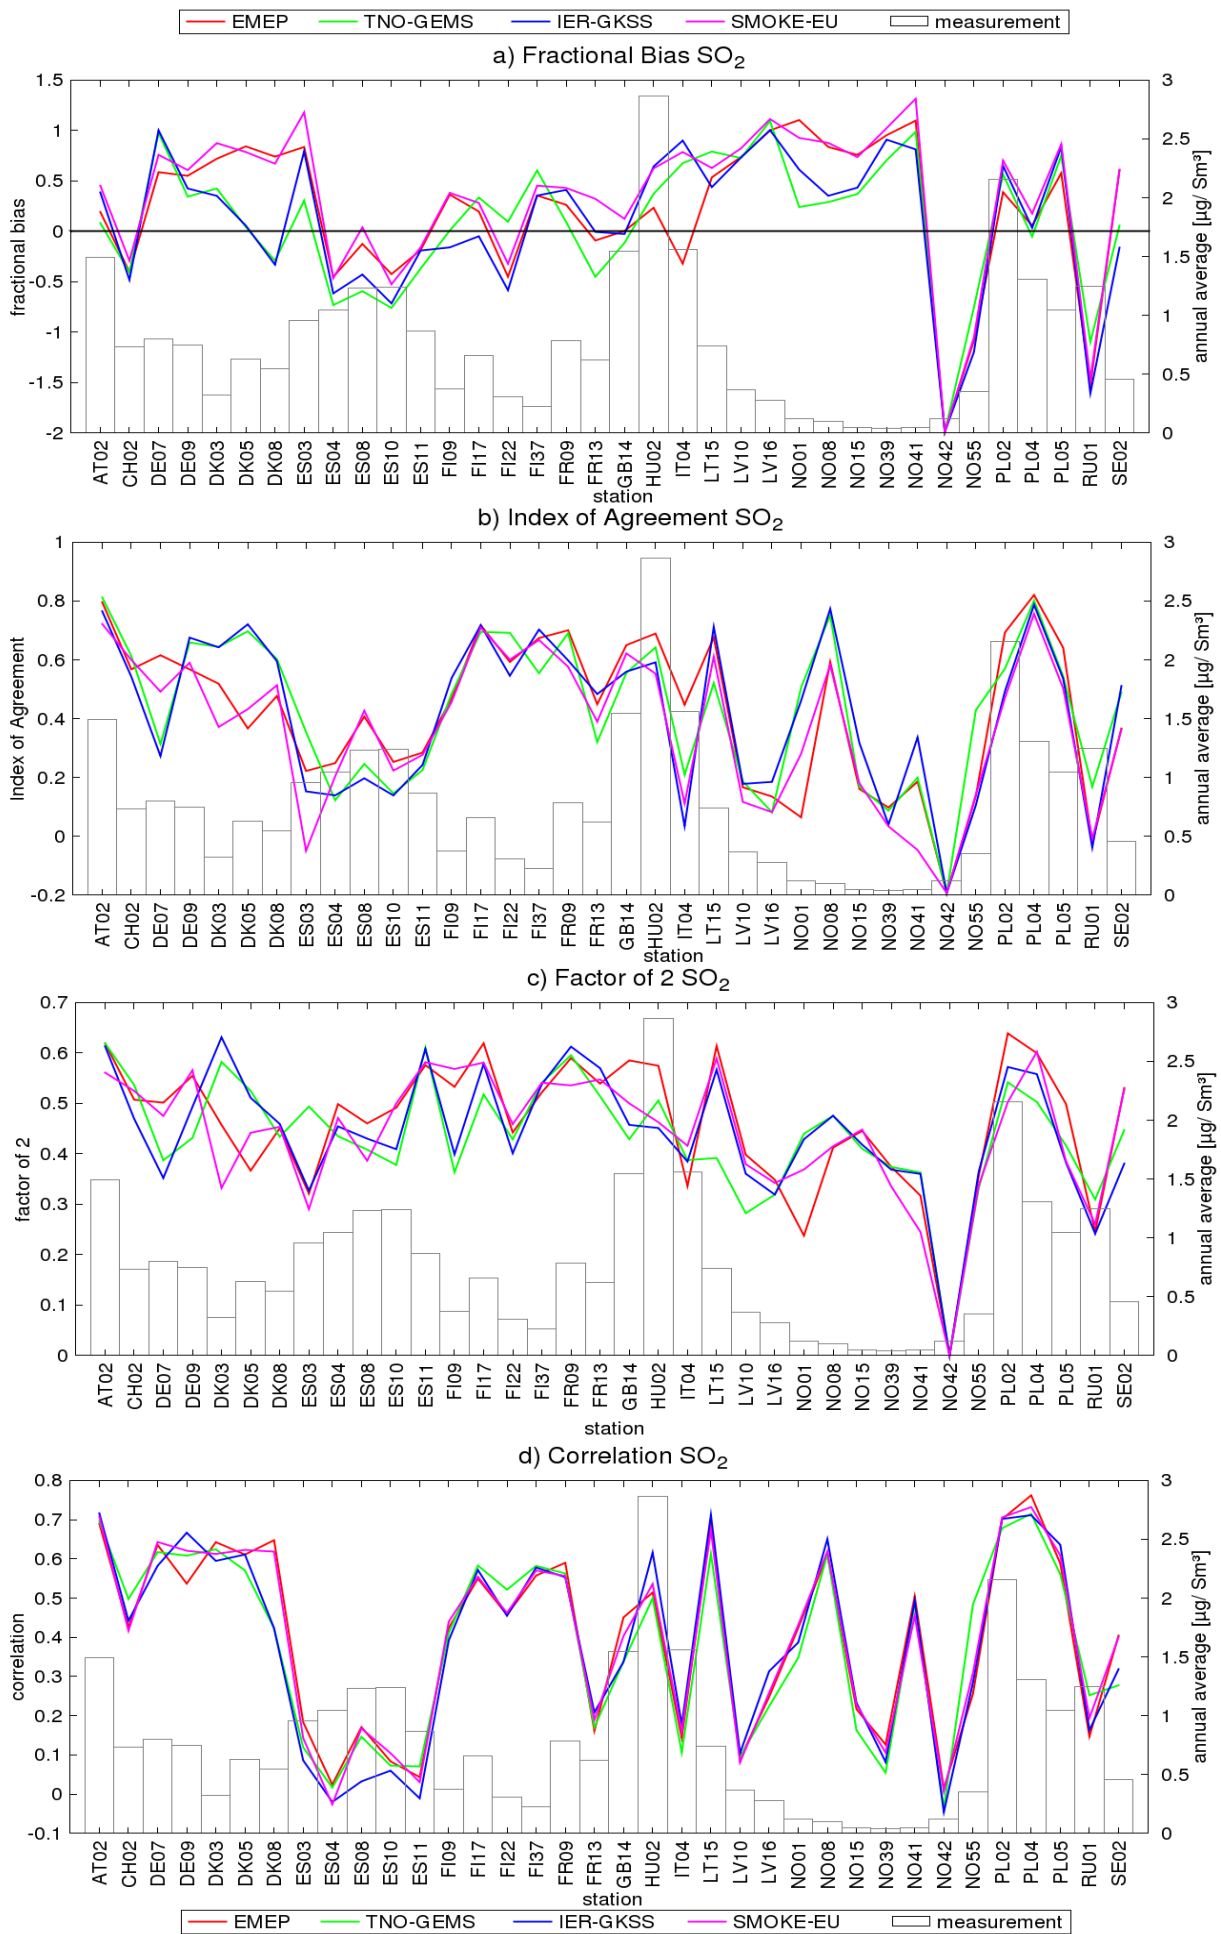

Figure S4: Comparison of mean daily air concentrations of SO<sub>2</sub>, calculated by CMAQ using four different emission datasets, with observations from rural EMEP stations for 2000.

a) fractional bias, b) index of agreement, c) relative amount of values within a factor of 2 (1=100%), d) correlation. Black boxes indicate measured annual average concentrations.
